# Supplementary material for: Protocol for a mixed methods realist evaluation of regional District Health Board groupings in New Zealand
Source: PubMed Central journal article supplement — BMJ Open. 2019 Mar 30;9(3):e030076. doi: 10.1136/bmjopen-2019-030076 (PMC6477391; doi:10.1136/bmjopen-2019-030076), 2019-03-30
Supplement: bmjopen-2019-030076.reviewer_comments.pdf [file bmjopen-2019-030076.reviewer_comments.pdf]

## PEER REVIEW HISTORY

BMJ Open publishes all reviews undertaken for accepted manuscripts. Reviewers are asked to complete a checklist review form (<http://bmjopen.bmj.com/site/about/resources/checklist.pdf>) and are provided with free text boxes to elaborate on their assessment. These free text comments are reproduced below.

## ARTICLE DETAILS

|                            |                                                                                                                                                           |
|----------------------------|-----------------------------------------------------------------------------------------------------------------------------------------------------------|
| <b>TITLE (PROVISIONAL)</b> | Protocol for a mixed methods realist evaluation of regional District Health Board groupings in New Zealand                                                |
| <b>AUTHORS</b>             | Stokes, Tim; Atmore, Carol; Penno, Erin; Richard, Lauralie; Wyeth, Emma; Richards, Rosalina; Doolan-Noble, F; Gray, Andrew; Sullivan, Trudy; Gauld, Robin |

This article was not externally reviewed at BMJ Open. Protocols that have been independently assessed prior to submission to BMJ Open are usually fast-tracked to publication on the grounds that further substantial changes will not be possible. This independent assessment will usually be external, independent review for both a substantial grant award from a non-commercial or government funder and ethics approval.
